# Supplementary material
Source: publisher site journal article supplement (https://iopscience.iop.org/1758-5090/10/3/034101/media/BFaac00c_suppdata.pdf)
Supplement: Supplementary file 1 [file BFaac00c_suppdata.pdf]

ShieldSquare Error


# Something went wrong

An error has prevented the portal from working properly.

Please contact us.

You reached this page when trying to access
**MDI3MDQ5ZTAzYjcxLTcyNDgtZjNlNC03NDRiLWRhYzdkOTUy** from
**3.139.81.58** on
**April 26 2024, 19:56:23 UTC**
